# Supplementary material for: Interleukin-6 Promotes Epithelial-Mesenchymal Transition and Cell Invasion through Integrin β6 Upregulation in Colorectal Cancer
Source: Hindawi journal article supplement (doi:10.1155/2020/8032187), 2020-08-13
Supplement: f1 [file 8032187.f1.zip]

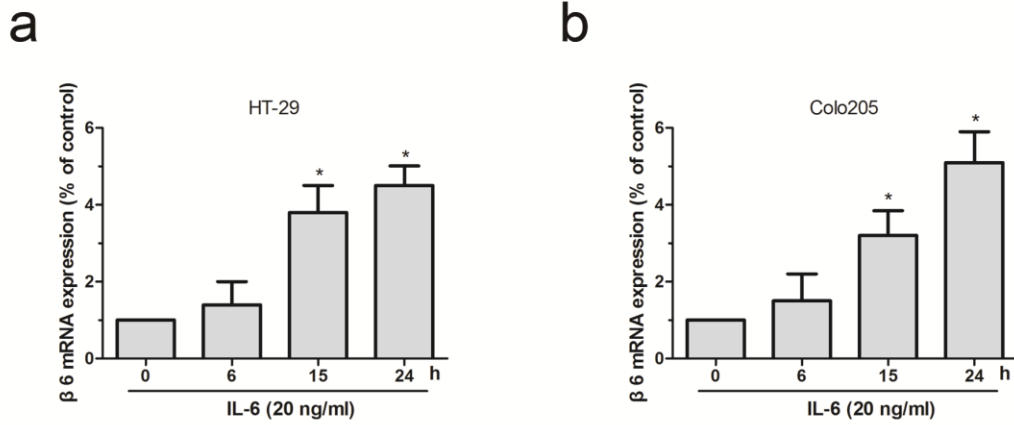

**Supplementary Fig. 1** Effect of IL-6 on the transcription of integrin  $\beta 6$  of CRC cells. qPCR analysis of integrin  $\beta 6$  gene in HT-29 (**a**) and Colo205 (**b**) cells treated by IL-6 (20 ng/ml) for different period intervals. Data represent the means  $\pm$  SEM.  $n=3$  independent experiments. \* $p<0.05$  versus no IL-6 treated control.

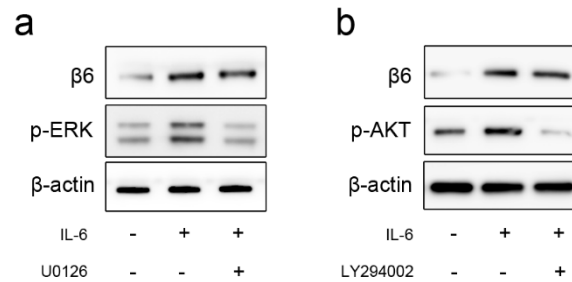

**Supplementary Fig. 2** ERK/MAPK and PI3K pathways are dispensable in IL-6-induced integrin  $\beta 6$  expression. HT-29 cells were pretreated with ERK/MAPK inhibitor U0126 (20  $\mu$ M) (**a**), or PI3K inhibitor LY294002 (20  $\mu$ M) (**b**) for 1 h before the treatment with IL-6 (20 ng/ml) for 24 h, and the expression of integrin  $\beta 6$  was detected. Data shown is representative of 3 independent experiments.
